# Supplementary material for: Effective Reminders
Source: Atypon-hosted journal article supplement (doi:10.1287/mnsc.2016.2499), 2016-06-27
Supplement: mnsc.2016.2499-sm-data.zip [file Data description.pdf › Data description.pdf]

# Effective Reminders

by

Giacomo Calzolari and Mattia Nardotto

## Guide to replication

**Data organization and do file** The datasets are in Stata format and all statistical elaborations are in the do file: **DoFile MS with comments.do**. The do file is divided in parts (following paper's sections) and all Tables and Figures reported in the paper or in the Appendix are reproduced. Variables' labels should be self-explanatory.

We provide four datasets, to ease the replication:

- **GymAttendance.dta**: dataset on attendance at the membership level (i.e., each record is a user-membership). This can be used to replicate the analysis of sections 3 and 5.
- **GymAttendanceHF.dta**: dataset on attendance at the day level (i.e., each record is a user-day). This can be used to replicate the analysis of section 4.
- **Supergym1.dta** this dataset is related to **GymAttendanceHF.dta** but it includes also days between memberships (i.e., when users do not have an active membership). It is used to generate the descriptive statistics in Table 8 in Appendix A.
- **OnlineServicesUse.dta**: this dataset reports the usage of the web pages (see footnote 9).

The main variables present in the datasets are:

- **idgym**: identifier of the user
- **treated**: dummy for the user being a treated user
- **contract\_id**: identifier for the membership
- **visit**: dummy to indicate that the user attended the gym in that day
- **remind\_day**: dummy for the day being a treated day
- **monthly\_visits**: number of monthly visits
